# Supplementary material for: Efficacy of Two Stabilizers in Nanoemulsions with Whey Proteins and Thyme Essential Oil as Edible Coatings for Zucchini
Source: MDPI journal article supplement (doi:10.3390/membranes12030326), 2022-03-15
Supplement: s1 [file s1]

# Efficacy of Two Stabilizers in Nanoemulsions with Whey Proteins and Thyme Essential Oil as Edible Coatings for Zucchini

Iulia Bleoanca <sup>1</sup>, Andreea Lanciu <sup>1</sup>, Livia Patraşcu <sup>2</sup>, Alina Ceoromila <sup>2</sup> and Daniela Borda <sup>1,\*</sup>

<sup>1</sup> Faculty of Food Science and Engineering, Dunarea de Jos University of Galati, 800201 Galati, Romania; Iulia.Bleoanca@ugal.ro (I.B.); andreealanciu@yahoo.com (A.L.)

<sup>2</sup> Cross-Border Faculty, Dunarea de Jos University of Galati, 111 Domneasca Str, 800201 Galati, Romania; Livia.Mantoc@ugal.ro (L.P.); Alina.Cantaragiu@ugal.ro (A.C.)

\* Correspondence: Daniela.Borda@ugal.ro; Tel.: +40-336-130-177

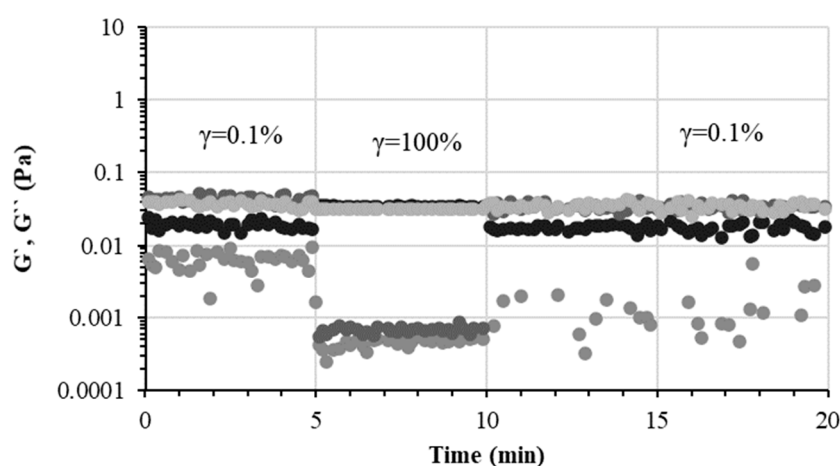

(a)

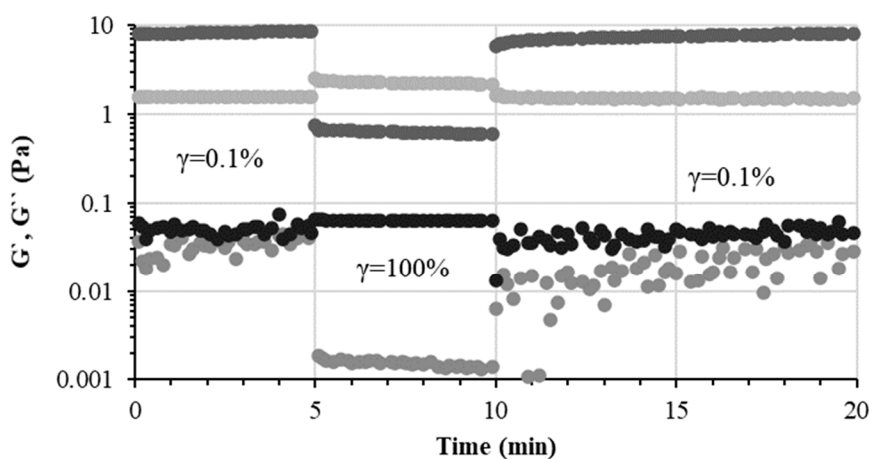

(b)

**Figure S1.** Rheological behavior during 3ITT test in small-amplitude oscillatory mode of obtained whey protein-thyme nanoemulsions. (a) T nanoemulsions; (b) S nanoemulsions.

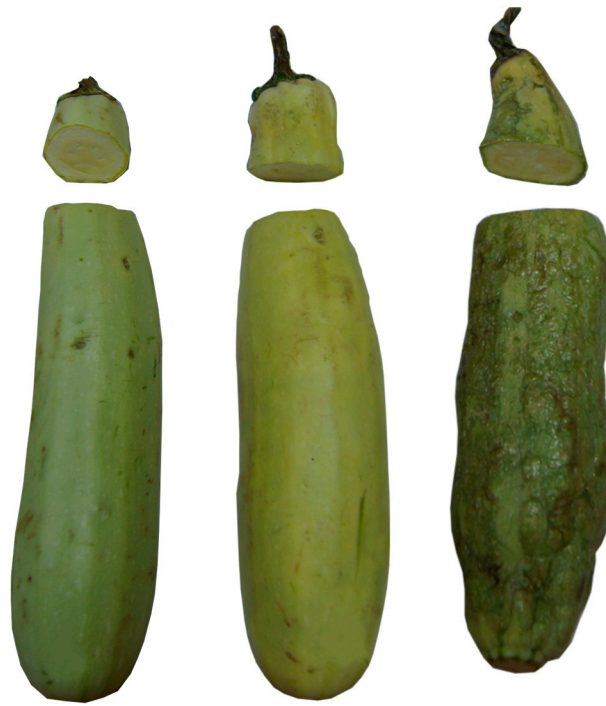

**Figure S2.** Prooxidant effect on zucchinis.

**Table S1.** Rheological parameters of T and S whey protein-thyme EO nanoemulsions compared to controls.

| Sample    | Apparent viscosity at 100 s <sup>-1</sup><br>(mPa.s) | % strain at G'-G'' intersection             |
|-----------|------------------------------------------------------|---------------------------------------------|
| T US      | 4.66 ± 0.72 <sup>a</sup>                             | 0.1171 ± 0.00 <sup>a</sup>                  |
| T Control | 5.27 ± 0.01 <sup>a</sup>                             | 0.0163 ± 0.00 <sup>a</sup>                  |
| S US      | 71.66 ± 1.85 <sup>b</sup>                            | 25.2020 ± 0.24 <sup>b</sup>                 |
| S Control | 9.77 ± 0.03 <sup>a</sup>                             | Viscous behavior with no intersection point |

The data are mean ± SD of three replicates from two reading. Different letters indicate significant differences with ANOVA and Tuckey post- hoc test at p < 0.05.
